# Supplementary material
Source: Springer Nature journal article supplement (https://www.springermedizin.de/resource/supplementary/12879_2009_918_MOESM2_ESM.pdf/9449638)

untitled 3 Display-5

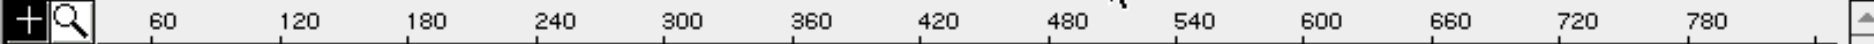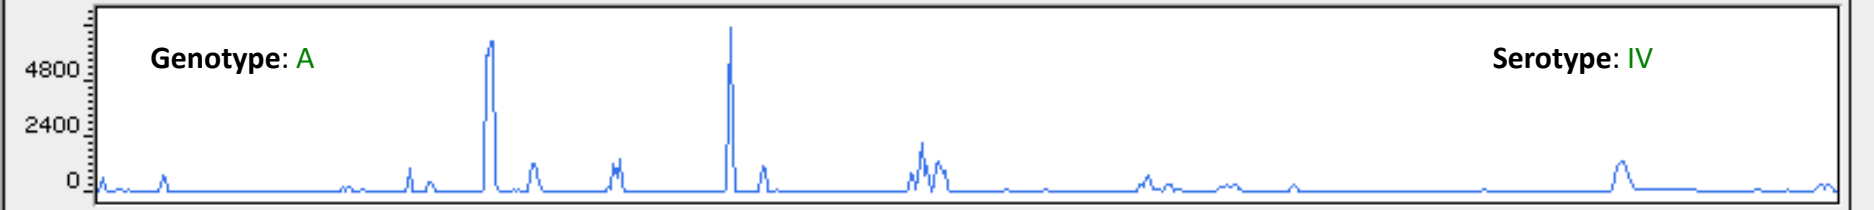

6B : RVS 047 R DC- /

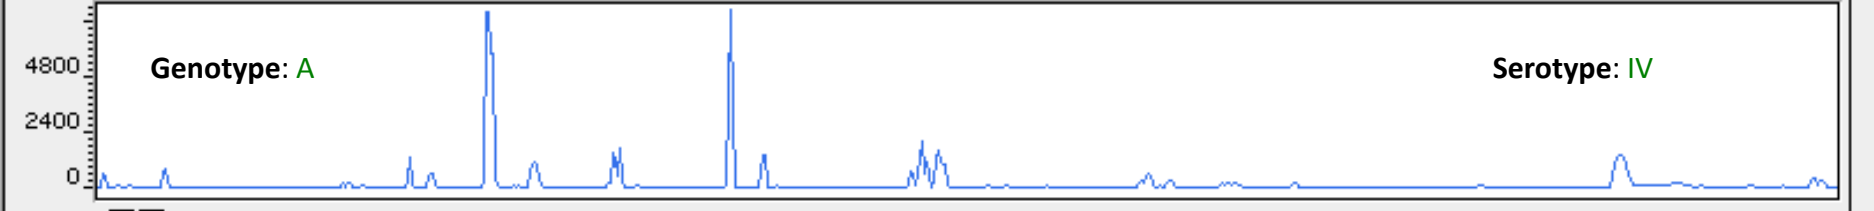

7B : RVS 047 R LC- /

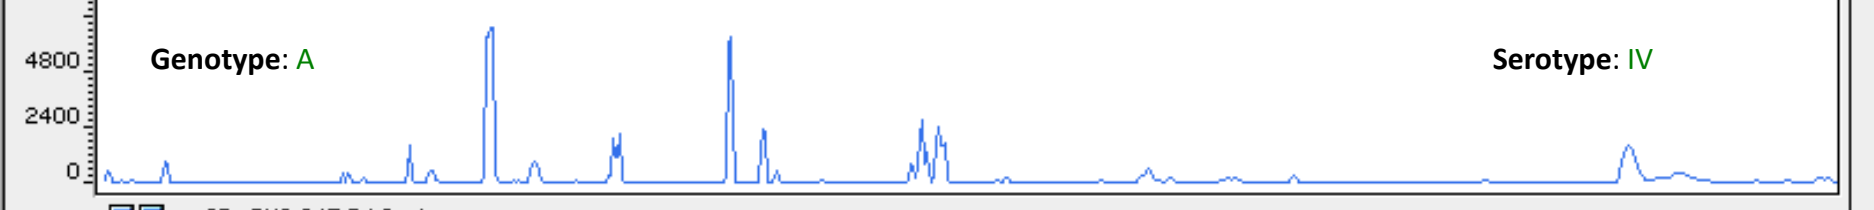

8B : RVS 047 R LG- /

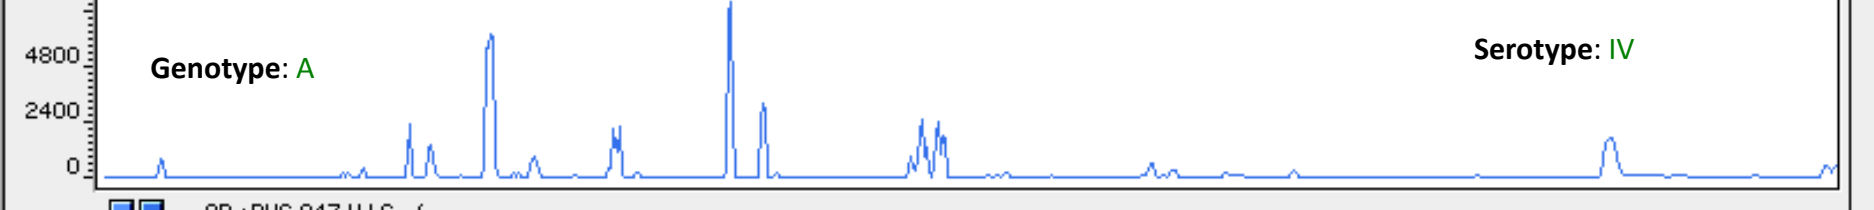

9B : RVS 047 V LC- /

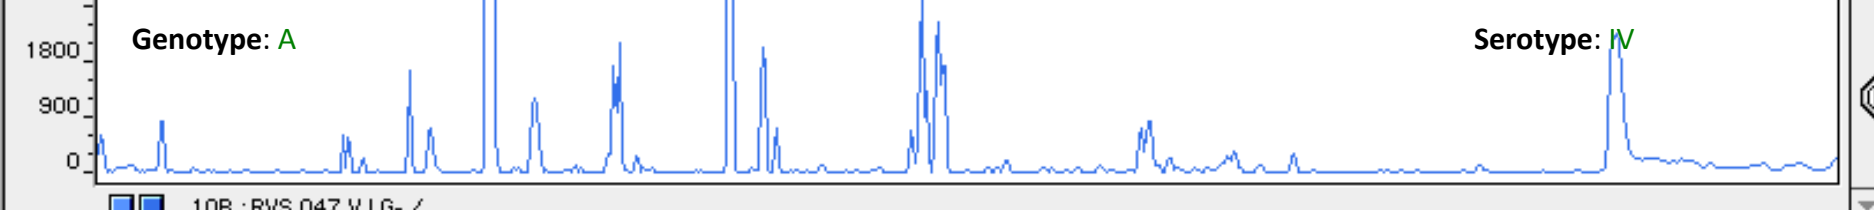

10B : RVS 047 V LG- /

X: Y: [Navigation icons]

Supplement: MOESM2 [file 9449638]
